# Supplementary material for: French Registry on Acute ST-elevation and non ST-elevation Myocardial Infarction 2010. FAST-MI 2010
Source: PubMed Central journal article supplement — Heart. 2012 May 1;98(9):699–705. doi: 10.1136/heartjnl-2012-301700 (PMC3329631; doi:10.1136/heartjnl-2012-301700), 2012-05-01
Supplement: heartjnl-2012-301700-s1.pdf [file heartjnl-2012-301700-s1.pdf]

## **General organisation of the FAST-MI 2010 registry:**

### **Coordination and management:**

- Clinical study: Nicolas Danchin, Hôpital Européen Georges Pompidou (HEGP), AP-HP, Paris, France
- Biologic study: Tabassome Simon, APHP, GHUEP, UPMC-Paris VI,
- Statistical analyses and data management: Jean Ferrières, Vincent Bataille, CHU de Toulouse, France; Nicolas Danchin, Etienne Puymirat, HEGP, AP-HP; Salma Kotti, Alexandra Rousseau, Marine Cachanado, URCEST, GHUEP, APHP ; Benoît Pace, Eric Schultz, Société Française de Cardiologie, Paris, France
- Logistics and follow-up: Geneviève Mulak, Société Française de Cardiologie, Elodie Drouet, URCEST, Tabassome Simon, GHUEP Hôpital St Antoine, Paris, Nicolas Danchin HEGP, AP-HP, Paris
- URCEST personnel (GHUEP, APHP) : Gisèle Affoyon , Maryam Salehi-Kani, Michael Combescot, Soumeya Tabhirt, Nora Soussi-Semai, Violaine Charbhili, Safia Benakli, Laura Epstein, Marc Benard , Brigitte Bonnodeau, Jennifer Piro
- Design and implementation of the electronic case record form: Benoît Pace, Frédérique Fortin, Eric Schultz, Société Française de Cardiologie, Paris

### **Executive Committee:**

Loïc Belle, Bernard Chevalier, Yves Cottin, Nicolas Danchin, Jean Ferrières, Martine Gilard, Patrick Goldstein, Michel Hanssen, Jean-Pierre Monassier, Dominique Pateron, François Schiele, Tabassome Simon, Gabriel Steg

### **Scientific Committee:**

Etienne Aliot, Nathalie Assez, Claude Barnay, Christophe Bauters, Paul Barragan, Loïc Belle, Didier Blanchard, Eric Bonnefoy, Richard Brion, Didier Carrié, Bernard Charbonnier, Bernard Chevalier, Sandrine Charpentier, Pierre Coste, Jean-Philippe Collet, Yves Cottin, Nicolas Danchin, Valérie Debierre, Geneviève Derumeaux, Jean -Jacques Dujardin, Hélène Eltchaninoff, Bruno Farah, François Funck, Alain Furber, Patrick Goldstein, Maxime Guenoun, Martine Gilard, Pascal Gueret, Michel Hanssen, Jocelyn Inamo, Jean-Michel Juliard, Khalifé Khalifé, Frédéric Lapostolle, Hervé Le Breton, Florence Leclercq, Thierry Lefèvre, Jacques Machecourt, Jean-Pierre Monassier, Jean-Louis Neimann, Franck Paganelli, Dominique Pateron, François Philippe, Vincent Probst, Bernard Ritz, Philippe Sans, François Schiele, Tabassome Simon, Louis Soulat, Christian Spaulding, Gabriel Steg, Jean François Thebaut

### **Contract research organisations:**

- Clinical data collection: Nadine Roumier, Caroline Hanus, Aline Hantzperg, ICTA, Fontaine-lès-Dijon, France
- CEMO: Arnaud Houille, Frédérique Arbeval-Flasque, Catherine Léger, Vincent Lorre
- INTEGRAGENE: Francis Rousseau, Céline Capera

**Central laboratory analyses and storage of blood samples:** CRB-HUEP, UF de pharmacologie Clinique, APHP, UPMC-Paris 06: Natacha Nohilé, Mariana Nedelcu, Naïma Haddad, Justine Druelle, Charlotte Mailhat, Christine Cotellon, Jérôme Cicolari

**Grant support from:**

MSD, Eli-Lilly and Daiichi-Sankyo alliance, AstraZeneca, Glaxo-Smith-Kline, sanofi-aventis, Novartis

**Sponsor:** Société Française de Cardiologie (President: Geneviève Derumeaux)

**Institutional support from:** Collège National des Cardiologues Français, Collège National des Cardiologues des Hôpitaux, SAMU-urgences de France, Société Française de Médecine d'Urgence

**Clinicaltrials.gov registration:** NCT01237418

**Participating centres:**

Name of institution, city, name of local coordinator, (number of patients included)

HOPITAL DU BOCAGE - CHU, DIJON, Y. COTTIN (125); HÔPITAL CARDIOLOGIQUE - CHU BORDEAUX, PESSAC, P. COSTE (103); CHU COTE DE NACRE, CAEN, T. LOGNOGNE (88); CHRU STRASBOURG, STRASBOURG, G. ROUL (70); HOPITAL CARDIOLOGIQUE LOUIS PRADEL, BRON , B. DE BREYNE (70); HÔPITAL BRABOIS - CHU NANCY, VANDOEUVRE LES NANCY, F. MOULIN (69); HOPITAL BON SECOURS, METZ, K. KHALIFE (67); HOPITAL A. MICHALLON - CHU, GRENOBLE, G. VANZETTO (64); CHU TOULOUSE RANGUEIL, TOULOUSE, D. CARRIE (58); CENTRE HOSPITALIER DU PAYS D'AIX, AIX-EN-PROVENCE, B. JOUVE (57); HÔPITAL PONTCHAILLOU, RENNES, G. LEURENT (57); CHU BESANÇON, BESANCON, F. SCHIELE (52); CLINIQUE BELLEDONNE, SAINT-MARTIN-D'HERES, L. HAMMER (51); CENTRE HOSPITALIER DE VALENCE, VALENCE, E. FAURE (50); CHU DE NANTES, NANTES, V. PROBST (50); CHU LA CAVALE BLANCHE, BREST, J. BOSCHAT (48); CHRU CLERMONT-FERRAND GABRIEL MONTPIED , CLERMONT FERRAND, P. MOTREFF (48); CENTRE HOSPITALIER ST-JOSEPH ET ST-LUC, LYON, B. RITZ (48); CH BRETAGNE ATLANTIQUE, VANNES, C. LE RAY (47); CH AVIGNON, AVIGNON, S. ANDRIEU (46); CENTRE HOSPITALIER GÉNÉRAL GIRAC-ANGOULÊME, SAINT MICHEL, V. LUCKE (43); CENTRE HOSPITALIER DE CORNOUAILLE, QUIMPER, G. ROUAULT (43); CENTRE HOSPITALIER DE BRIVE-LA-GAILLARDE, BRIVE, JP. FAURE (43); CLINIQUE DU MILLÉNAIRE, MONTPELLIER, G. LEVY (43); HÔPITAL ARNAUD DE VILLENEUVE, MONTPELLIER, F. LECLERCQ (42); CLINIQUE CONVERT, BOURG en BRESSE, C. ROBIN (42); CENTRE HOSPITALIER SAINT LOUIS, LA ROCHELLE, Y. VALY (41); CHRU DE LILLE HÔPITAL CARDIOLOGIQUE, LILLE, P. ASSEMAN (41); HOPITAL EUROPEEN GEORGES POMPIDOU, PARIS, N. DANCHIN (41); CENTRE HOSPITALIER UNIVERSITAIRE CAREMEAU, NIMES, L. SCHMUTZ (39); CENTRE HOSPITALIER DE PAU - HOPITAL FRANCOIS MITTERRAND, PAU, N. DELARCHE (39); CENTRE HOSPITALIER MULHOUSE, MULHOUSE, JY. WIEDEMANN (39); CENTRE HOSPITALIER JACQUES COEUR,

BOURGES, X. TABONE (37); HOPITAL TROUSSEAU - CHU, TOURS, G. PACOURET (35); HÔPITAL ANDRÉ MIGNOT, LE CHESNAY, J. SCHWOB (35); CHU HENRI MONDOR, CRETEIL, P. LIM (35); CH DÉPARTEMENTAL, LA ROCHE sur YON, L. ORION (34); CENTRE HOSPITALIER DU DOCTEUR SCHAFFNER, LENS, M. EL MOUJAHID (33); GROUPE CARDIOLOGIE INTERVENTIONNELLE SAINT LAURENT, RENNES, P. DRUELLES (32); CENTRE HOSPITALIER DE LA REGION ANNECIENNE, METZ-TESSY, L. BELLE (32); CLINIQUE PASTEUR, TOULOUSE, J. FAJADET (31); CENTRE HOSPITALIER ROBERT BOULIN, LIBOURNE, JM. PERRON (31); HÔPITAL LARIBOISIÈRE, PARIS, P. HENRY (31); CENTRE HOSPITALIER DU MANS, LE MANS, P. ROSAK (30); HÔPITAL BICHAT, PARIS, G. DUCROCQ (30); HÔPITAL CHARLES NICOLLE, ROUEN, C. TRON (30); CLINIQUE SAINT-HILAIRE , ROUEN, N. DUVILLA (30); CENTRE HOSPITALIER DE LAGNY - MARNE-LA-VALLEE, LAGNY-SUR-MARNE, S. ELHADAD (30); CH LOUIS PASTEUR, LE COUDRAY, T. DEMICHELI (30); CHU DUPUYTREN, LIMOGES, V. ROUSSELLE (29); CENTRE HOSPITALIER BRETAGNE SUD, LORIENT, S. CAZAUX (28); CENTRE HOSPITALIER GENERAL, NEVERS, J. BALLOUT (28); CENTRE HOSPITALIER DE ST NAZAIRE, SAINT NAZAIRE, L. GENET (27); CHU REIMS, REIMS, B. HERCE (26); CLINIQUE LAFOURCADE, BAYONNE, JL. BANOS (26); CHU HOPITAL SUD, AMIENS, G. JARRY (26); HOPITAL FOCH, SURESNES, H. BENAMER (26); HOPITAL INTERCOMMUNAL ROBERT BALLANGER, AULNAY-SOUS-BOIS, JM. MONTELY (26); POLYCLINIQUE DU PARC RAMBOT, AIX EN PROVENCE, P. JOLY (25); HOPITAL NORD - CHU, MARSEILLE, F. PAGANELLI (24); CENTRE HOSPITALIER YVES LE FOLL, SAINT BRIEUC, R. DELAUNAY (24); CENTRE HOSPITALIER DE CANNES, CANNES, T. TIBI (24); CLINIQUE DE FONTAINE LES DIJON, FONTAINE-LES-DIJON, G. DENTAN (23); CLINIQUE MUTUALISTE DES EAUX CLAIRES, GRENOBLE, P. BOULARD (23); CLINIQUE DU TONKIN, VILLEURBANNE, D. CHAMPAGNAC (23); CENTRE HOSPITALIER D'AUXERRE, AUXERRE, FX. SOTO (23); CHU TIMONE, MARSEILLE, JL. BONNET (22); CENTRE HOSPITALIER DE BELFORT-MONTBELIARD, BELFORT, Y. LE FRANCOIS (22); CENTRE HOSPITALIER VICTOR DUPOUY, ARGENTEUIL, F. DUCLOS (21); CENTRE HOSPITALIER DE COMPIÈGNE, COMPIEGNE , A. LUYCX-BORE (20); CENTRE HOSPITALIER GENERAL MARECHAL JOFFRE, PERPIGNAN, C. BOUREUX (20); GROUPE HOSPITALIER PITIÉ-SALPÊTRIÈRE, PARIS, JP. COLLET (20); HOPITAL PRIVE D'ANTONY - LA PROVIDENCE, ANTONY, P. DUPOUY (20); CENTRE HOSPITALIER DE VICHY, VICHY, R. RAVAN (19); POLYCLINIQUE LOUIS PASTEUR, ESSEY-LES-NANCY, M. AMOR (19); GROUPE HOSPITALIER DU HAVRE - HOPITAL JACQUES MONOD, LE HAVRE, P. BONNET (19); CHI DE POISSY – SAINT-GERMAIN-EN-LAYE, POISSY, X. MARCHAND (19); CENTRE CARDIOLOGIQUE D'EVECQUEMONT, EVECQUEMONT, R. BOURKAIB (19); HOPITAL EUROPEEN DE PARIS - LA ROSERAIE, AUBERVILLIERS, H. BEN AMER (19); CENTRE HOSPITALIER DE TROYES, TROYES, B. MAILLIER (19); CLINIQUE AMBROISE PARÉ, NEUILLY sur SEINE, R. PILLIERE (19); CLINIQUE DU PONT DE CHAUME, MONTAUBAN, P. BERNARD (18); HOPITAL LA MILETRIE - CHU, POITIERS, D. COISNE (18); CENTRE HOSPITALIER SUD FRANCILIEN, CORBEIL-ESSONNES, R. BERTHIER (18); CH CHALON SUR SAONE, CHALON SUR SAONE, M. FAYARD (18); CLINIQUE SAINT-GATIEN, TOURS, B. MAGDELAINE (17); CLINIQUE AMBROISE PARE, NANCY, M. PICHENE (17); CENTRE HOSPITALIER REGIONAL, DUNKERQUE, S. WERQUIN (17); HOPITAL COCHIN, PARIS, H. AELION (17); CHI ANDRÉ GRÉGOIRE DE MONTREUIL, MONTREUIL, A. BOCCARA (17); CLINIQUE ST HILAIRE, AGEN, J. ARMENGAUD (17); INSTITUT ARNAULT TZANCK, SAINT LAURENT DU VAR, P. MEYER (17); CHU PASTEUR, NICE, E. FERRARI (16); CENTRE HOSPITALIER DE PERIGUEUX, PERIGUEUX, P. JARNIER (16); CLINIQUE SAINT-MARTIN, PESSAC, B. KARSENTY (16); CENTRE HOSPITALIER GENERAL DE VALENCIENNES, VALENCIENNES, JC. BODART (16); CCN, SAINT DENIS, T. JULLIEN (16); POLYCLINIQUE LES FLEURS, OLLIOULES, P. BARRAGAN (16); CENTRE HOSPITALIER DE CHATEAUROUX, CHATEAUROUX , B. KOUJAN (15);CLINIQUE DE L'EUROPE, AMIENS, E. DADEZ (15); CENTRE HOSPITALIER PRIVE SAINT-MARTIN, CAEN, B. HURET (14); CHG BASTIA, BASTIA, Z. BOUERI (14);

HÔPITAL ST PHILIBERT, LOMME, P. GRAUX (14); HÔPITAL DE LA CROIX ROUSSE, LYON, P. LANTELME (14); CENTRE HOSPITALIER DE NIORT, NIORT, H. LE BRIS (14); HÔPITAL FONT PRÉ, TOULON, L. NAIT SAIDI (14); CENTRE CHIRURGICAL MARIE LANNELONGUE, LE PLESSIS-ROBINSON, F. RAOUX (14); CENTRE HOSPITALIER DE GONESSE, GONESSE, M. COCO (14); CLINIQUE DU DIACONAT, MULHOUSE, JP. MONASSIER (14); CLINIQUE BERGOUIGNAN, EVREUX, X. FAVEREAU (14); POLYCLINIQUE DE COURLANCY, REIMS, C. BRASSELET (13); POLYCLINIQUE DU BOIS, LILLE, G. TRAISNEL (13); CLINIQUE LES FONTAINES, MELUN, P. DUPOUY (13); CHI LE RAINCY-MONTFERMEIL, MONTFERMEIL, O. NALLET (13); HOPITAL NORD - CHU, SAINT ETIENNE, A. CERISIER (13); CENTRE HOSPITALIER LAENNEC DE CREIL, CREIL, B. CHEVALIER (13); CENTRE HOSPITALIER UNIVERSITAIRE, ANGERS, A. FURBER (12); CENTRE HOSPITALIER HAGUENAU, HAGUENAU, A. KOEGLER (12); CENTRE HOSPITALIER DE BÉZIERS, BEZIERS, S. SEDIGHIAN (12); CLINIQUE SAINT VINCENT, BESANCON, PY. PETITEAU (11); CHU AMBROISE PARÉ, BOULOGNE , S. PERROT (11); CHG DE GUÉRET, GUERET, G. BESSEDE (11); HOPITAL ALBERT SCHWEITZER PSPH, COLMAR, A. VERDUN (11); POLYCLINIQUE VAUBAN, VALENCIENNES, JL. FOURRIER (11); CLINIQUE AXIUM, AIX EN PROVENCE, L. MAILLARD (10); NOUVELLES CLINIQUES NANTAISES, NANTES, P. BRUNEL (10); CLINIQUE CARDIOLOGIQUE D'ARESSY, ARESSY, J. COUPILLAUD (10); HÔPITAL ANTOINE BÉCLÈRE, CLAMART, M. SLAMA (10); CENTRE HOSPITALIER DE LAON, LAON, R. SADER (10); CENTRE HOSPITALIER DE BÉTHUNE, BETHUNE, J. DARCHIS (10); CENTRE HOSPITALIER DE DOUARNENEZ, DOUARNENEZ, JP. ELKAIM (10); CLINIQUE BOUCHARD, MARSEILLE, B. VAHDAT (9); CLINIQUE DE LA REINE BLANCHE, ORLEANS, H. KAMAL (9); CLINIQUE DE L'ORANGERIE, STRASBOURG, M. ZAEHRINGER (9); INSTITUT MUTUALISTE MONTSOURIS, PARIS, F. PHILIPPE (9); CLINIQUE BIZET, PARIS, R. CADOR (9); CENTRE HOSPITALIER DE TULLE, TULLE, A. BETTIOUI (9); CENTRE HOSPITALIER D'ABBEVILLE, ABBEVILLE, JE. POULARD (9); CENTRE HOSPITALIER BAGNOLS SUR CEZE, BAGNOLS SUR CEZE, G. ALLARD LATOUR (9); CENTRE HOSPITALIER D'ARRAS, ARRAS, D. BROUCQSAULT (9); CH BASSIN DE THAU, SETE, J. ETTORI (9); CENTRE HOSPITALIER D'ANTIBES, ANTIBES, F. BERNASCONI (9); POLYCLINIQUE DE BORDEAUX-CAUDERAN, BORDEAUX-CAUDERAN, F. CASTEIGT (8); HOPITAL CLINIQUE CLAUDE BERNARD, METZ, A. HUEBER (8); HOSPICE CIVIL - CHG LOUIS PASTEUR, COLMAR, B. METTAUER (8); HOPITAL D'INSTRUCTION DES ARMEES DU VAL-DE-GRACE, PARIS, P. SCHIANO (8); CH PUBLIC DU COTENTIN, CHERBOURG, P. LOISELET (8); CENTRE HOSPITALIER DE DAX, DAX, JL. ROYNARD (8); CENTRE HOSPITALIER DE LANGRES, LANGRES, M. MARTELET (8); CENTRE HOSPITALIER MARIE MADELEINE, FORBACH, JP. GODENIR (8); CENTRE HOSPITALIER DE DOUAI, DOUAI, JJ. DUJARDIN (8); CH DE SAINT OMER, HELFAUT, H. SAADOUNI (8); CENTRE HOSPITALIER ANNEMASSE, AMBILLY, P. FROMAGE (8); CENTRE HOSPITALIER DE ST LO, SAINT LO, L. MICHEL (8); CLINIQUE DE L'ORMEAU, TARBES, N. LEY (8); CLINIQUE DU GRAND LARGE, BREST, C. BREUT (7); CMC PARLY II, LE CHESNAY, X. FAVERAU (7); CENTRE HOSPITALIER INTERCOMMUNAL, VILLENEUVE-SAINT-GEORGES, E. FONSECA (7); CENTRE HOSPITALIER DE VERDUN, VERDUN, S. ALLAM (7); CENTRE HOSPITALIER DE CHALONS EN CHAMPAGNE, CHALONS EN CHAMPAGNE cedex, E. BERUBEN (7); CENTRE HOSPITALIER JEAN MONNET, EPINAL, P. ADMANT (7); HÔPITAL SAINT-ANTOINE GHU EST, PARIS, A. COHEN (6); INSTITUT HOSPITALIER JACQUES CARTIER - ICPS, MASSY, I. LAURENT (6); CH INTERCOMMUNAL ELBEUF LOUVIERS, ELBEUF, J. HAAS (6); CENTRE HOSPITALIER DE SARLAT JEAN LECLAIRE, SARLAT, P. EYMERIT (6); CHG D'AUCH, AUCH, M. LESCURE (6); CH DE FREYMING, FREYMING-MERLEBACH, A. GABRIEL (6); CH DE CAMBRAI, CAMBRAI, A. BELHASSANE (6); HÔPITAL SAINT ANDRÉ, BORDEAUX, J. LITALIEN (6); CENTRE HOSPITALIER JACQUES PUEL, RODEZ, J. SOUK-ALOUN (6); POLYCLINIQUE DE LA LOUVIÈRE, LILLE, JL. FOURRIER (6); HOPITAL PRIVE "LES FRANCISCAINES", NIMES, P. RIOUX (5); CLINIQUE DES CEDRES, CORNEBARRIEU, F. BRUNELLE (5); CLINIQUE ALLERAY-LABROUSTE, PARIS, D. HAMANI (5); CENTRE MEDICO-CHIRURGICAL DE L'EUROPE, PORT-MARLY, L. SARFATI (5); CENTRE

HOSPITALIER DE CALAIS, CALAIS, F. THIEULEUX (5); CENTRE HOSPITALIER D'USSEL, USSEL, A. BERENFELD (5); CH CHATEAUBRIANT, CHATEAUBRIANT, P. AIRAUD (5); CENTRE HOSPITALIER GUSTAVE DRON, TOURCOING, E. DECOULX (5); CH MANCHESTER, CHARLEVILLE-MEZIERES, V. HEROGUELLE (4); INFIRMERIE PROTESTANTE, CALUIRE et CUIRE, JP. CLAUDEL (4); HÔPITAL DE CHANAUX, MACON, A. RIBIER (4); HOPITAL D'INSTRUCTION DES ARMEES SAINTE-ANNE, TOULON NAVAL, G. CELLARIER (4); CENTRE HOSPITALIER LOUIS PASTEUR, DOLE, D. MAGNIN (4); CH BRY SUR MARNE HÔPITAL SAINT CAMILLE, BRY SUR MARNE, R. MEGBEMADO (4); HÔPITAL GÉNÉRAL HÔTEL DIEU, PONT L'ABBE, U. MISCHKE (4); CENTRE HOSPITALIER DE LONS LE SAUNIER, LONS LE SAUNIER, D. BABORIER (4); HÔPITAL BEL AIR, THIONVILLE, JY. THISSE (4); CH SAMBRE AVESNOIS, MAUBEUGE, B. JELLOULI (4); CENTRE HOSPITALIER DE ROUBAIX, ROUBAIX, JM. DEMARCO (4); CENTRE HOSPITALIER DE CHAMBERY, CHAMBERY, JP. HUGON (3); CENTRE HOSPITALIER RENE DUBOS, PONTOISE, F. FUNCK (3); CENTRE HOSPITALIER DE ROANNE, ROANNE, M. MTEIREK (3); CENTRE HOSPITALIER DE ST DIE, SAINT-DIE, JL. BOURDON (3); CENTRE HOSPITALIER D'AURILLAC, AURILLAC, L. DUTOIT (3); CENTRE HOSPITALIER DE ST DIZIER, SAINT DIZIER, A. BINEAU-JORISSE (3); HOPITAL ST JOSEPH, MARSEILLE, P. JOLY (3); CENTRE HOSPITALIER AVRANCHES GRANVILLE , GRANVILLE, JP. RAY (3); HOPITAL AMERICAIN DE NEUILLY, NEUILLY sur SEINE, F. TARRAGANO (2); CENTRE HOSPITALIER DE ST JUNIEN, SAINT JUNIEN , H. JEBAI (2); CH DE NARBONNE, NARBONNE, G. BARADAT (2); CENTRE HOSPITALIER DE PONTARLIER, PONTARLIER, M. TISSOT (2); CH DU CENTRE BRETAGNE, PONTIVY, G. BUREAU (2); CENTRE HOSPITALIER D'ARMENTIÈRES, ARMENTIERES, V. DECOURCELLE (2); CENTRE HOSPITALIER OYONNAX, OYONNAX, JJ. HALARY (2); CENTRE HOSPITALIER DE SAINTES, SAINTES, MP. BIENVENU (2); CENTRE HOSPITALIER DE GAP, GAP, B. D'HAUTEFEUILLE (1); CH LANNION, LANNION, G. GOSSELIN (1); CENTRE HOSPITALIER BAZIN, VOIRON , E. COZ (1); CENTRE HOSPITALIER DE CHAUMONT, CHAUMONT, O. CLAUDON (1); CENTRE HOSPITALIER D'ALBI, ALBI, D. GALLEY (1); CENTRE INTERCOMMUNAL SUD LEMAN VALSERINE, SAINT JULIEN EN GENEVOIS, R. BENDERBOUS (1); CENTRE HOSPITALIER VAL D'ARIEGE, FOIX, S. DESTAC (0).
